# Supplementary material for: Revisiting the Role of Collaboration in Creating Breakthrough Inventions
Source: Atypon-hosted journal article supplement (doi:10.1287/msom.2019.0858), 2020-04-30
Supplement: msom.2019.0858.sm1.pdf [file msom.2019.0858.sm1.pdf]

# “Revisiting the Role of Collaboration in Creating Breakthrough Inventions”

## (Online Supplement)

### I) Identifying number of chunks in a utility patent

What follows is pseudo-code for the algorithm used to identify the number of chunks in a utility patent. The algorithm uses Stanford CoreNLP (9 December 2015 version) with Perl (5.14.2.1 v7) as a wrapper.

1. For each claim, identify whether it is independent or dependent by using a regular-expression search for the term “claim #”, where # signifies any number.
2. If the claim is independent:
  - a. Break down the claim into individual words.
  - b. Tag each word in the claim with its type: noun, adjective, verb, etc.
  - c. Identify the root for each word (e.g., reduce the word “surfaces” to “surface”).
  - d. Identify the subject matter for the claim based on first-occurring noun phrase with adjectives (e.g., “outer free end”, “elastic strip”, “bioprosthetic mitral valve replacement”).
3. If the claim is dependent:
  - a. Take the sentence starting after “claim #”—for example, from the text “A mitral valve replacement as in claim 1, wherein the base is...” use only “wherein the base is...”.
  - b. Return to steps a.–d. of Step 2.
4. Count the number of distinct subject matter in the patent.

### II) Additional analyses:

This supplement also provides tables that summarize results of the following analyses:

- Interactions with invention “size” and using alternative measures of decomposability: Table 6
- Models (logit with random effects, linear probability, and quantile) that use the full sample: Table 7.
- *Effects on different quantiles*
  - Examining the effects across the entire distribution of outcomes using quantile regressions: utility patents, Table 8; design patents, Table 9
  - Redefining “breakthrough” as the top 1st percentile (in citations): Table 10, Models 38 and 39
  - Predicting failures using the bottom 5th percentile (in citations): Table 10, Models 40 and 41

- *Models used for additional robustness tests*
  - Pooling design data and utility data: Table 11, Models 42 and 43
  - Controlling for team characteristics: Table 11, Models 44 and 45
  - Omitting all collinear variables: Table 11, Models 46 and 47
  - Inclusion of the interaction between *Sole* and *Fees*: Table 11, Models 48 and 49
  - Incorporating product class (resp., firm heterogeneity): Table 12, Models 50 and 51 (resp., Models 52 and 53)
  - Using the alternative inventor ID of Li et al. (2014): Table 12, Model 54
  - Using a random-inventor instead of a lead-inventor benchmark: Table 12, Models 55 and 56
  - First-stage regression results for instrumental variable estimation: Table 13, Models 57 and 58

**Table 6:** Interactions with invention “size” and using alternative measures of decomposability

| Dataset<br>Model                       | Utility                                | Utility                           | Utility                       |
|----------------------------------------|----------------------------------------|-----------------------------------|-------------------------------|
|                                        | Interaction<br>with “size”<br>Model 19 | Gini-Simpson<br>index<br>Model 20 | Modularity<br>$Q$<br>Model 21 |
| <i>Sole</i>                            | -0.15*** (0.02)                        | -0.13*** (0.02)                   | -0.15*** (0.02)               |
| <i>LogPastCollab(dm)</i>               | 0.02 (0.02)                            | -0.04* (0.02)                     | 0.02 (0.02)                   |
| <i>LogExp</i>                          | -0.52*** (0.03)                        | -0.34*** (0.03)                   | -0.52*** (0.03)               |
| <i>LogExpDiversity</i>                 | 0.27*** (0.03)                         | 0.10** (0.04)                     | 0.27*** (0.03)                |
| <i>Assigned</i>                        | 0.03 (0.03)                            | 0.04 (0.03)                       | 0.03 (0.03)                   |
| <i>LogChunks(dm)</i>                   | 0.19*** (0.02)                         |                                   |                               |
| <i>GSI(dm)</i>                         |                                        | 0.09+ (0.05)                      |                               |
| <i>Q(dm)</i>                           |                                        |                                   | 0.47*** (0.08)                |
| <i>LogClaims</i>                       | 0.17*** (0.02)                         | 0.28*** (0.01)                    | 0.27*** (0.01)                |
| <i>LogWords</i>                        | 0.08*** (0.01)                         | 0.09*** (0.01)                    | 0.09*** (0.01)                |
| <i>LogFigures</i>                      | 0.30*** (0.01)                         | 0.29*** (0.01)                    | 0.30*** (0.01)                |
| <i>LogAssignedClasses</i>              | 0.33*** (0.01)                         | 0.35*** (0.01)                    | 0.33*** (0.01)                |
| <i>LogCitedClasses</i>                 | 0.02 (0.02)                            | -0.06** (0.02)                    | 0.01 (0.02)                   |
| <i>LogPatentCites</i>                  | 0.09*** (0.01)                         | 0.13*** (0.01)                    | 0.09*** (0.01)                |
| <i>LogNonpatentCites</i>               | 0.05*** (0.01)                         | 0.04*** (0.01)                    | 0.04*** (0.01)                |
| <i>Fees</i>                            | 0.38*** (0.03)                         | 0.33*** (0.03)                    | 0.37*** (0.03)                |
| <i>Sole</i> × <i>LogChunks(dm)</i>     | -0.08* (0.03)                          |                                   |                               |
| <i>Sole</i> × <i>LogClaims(dm)</i>     | 0.01 (0.03)                            |                                   |                               |
| <i>Sole</i> × <i>LogWords(dm)</i>      | 0.03 (0.02)                            |                                   |                               |
| <i>Sole</i> × <i>GSI(dm)</i>           |                                        | -0.17* (0.07)                     |                               |
| <i>Sole</i> × <i>Q(dm)</i>             |                                        |                                   | -0.36** (0.13)                |
| <i>Sole</i> × <i>LogPastCollab(dm)</i> | 0.06*** (0.01)                         | 0.07*** (0.01)                    | 0.06*** (0.01)                |
| Filing-year FE                         | Yes                                    | Yes                               | Yes                           |
| Lead-inventor FE                       | Yes                                    | Yes                               | Yes                           |
| <i>N</i>                               | 368,899                                | 415,249                           | 368,899                       |
| Log-likelihood                         | -93,899                                | -107,873                          | -93,944                       |
| $\chi^2$                               | 12,288                                 | 11,712                            | 12,280                        |

Notes: Standard errors (in parentheses) are clustered by lead inventor. (*dm*) = de-meaned; FE = fixed effects.

+  $p < 0.10$ , \*  $p < 0.05$ , \*\*  $p < 0.01$ , \*\*\*  $p < 0.001$

**Table 7:** Approaches using the entire dataset

| <b>Dataset</b>                            | <i>Utility</i>     | <i>Design</i>      | <i>Utility</i>        | <i>Design</i>         | <i>Utility</i>     | <i>Design</i>      |
|-------------------------------------------|--------------------|--------------------|-----------------------|-----------------------|--------------------|--------------------|
| <b>Specification:</b>                     | Logit<br>with RE   | Logit<br>with RE   | Linear<br>probability | Linear<br>probability | Quantile           | Quantile           |
| <b>Variable</b>                           | <b>Model 22</b>    | <b>Model 23</b>    | <b>Model 24</b>       | <b>Model 25</b>       | <b>Model 26</b>    | <b>Model 27</b>    |
| <i>Sole</i>                               | -0.16***<br>(0.02) | 0.06<br>(0.04)     | -0.008***<br>(0.001)  | 0.005<br>(0.003)      | -0.05***<br>(0.01) | 0.01<br>(0.01)     |
| <i>LogPastCollab(dm)</i>                  | 0.11***<br>(0.01)  | 0.04<br>(0.04)     | -0.002*<br>(0.001)    | -0.003<br>(0.004)     | -0.03***<br>(0.00) | -0.06***<br>(0.01) |
| <i>LogExp</i>                             | -0.29***<br>(0.02) | -0.20***<br>(0.05) | -0.034***<br>(0.002)  | -0.022***<br>(0.005)  | -0.10***<br>(0.01) | 0.02*<br>(0.01)    |
| <i>LogExpDiversity</i>                    | 0.23***<br>(0.02)  | 0.28**<br>(0.09)   | 0.025***<br>(0.002)   | 0.026***<br>(0.007)   | 0.32***<br>(0.01)  | 0.29***<br>(0.02)  |
| <i>Assigned</i>                           | 0.14***<br>(0.02)  | 0.89***<br>(0.05)  | -0.000<br>(0.001)     | 0.007<br>(0.005)      | 0.18***<br>(0.00)  | 0.28***<br>(0.01)  |
| <i>LogChunks(dm)</i>                      | 0.20***<br>(0.02)  |                    | 0.010***<br>(0.001)   |                       | 0.05***<br>(0.00)  |                    |
| <i>LogClaims</i>                          | 0.24***<br>(0.01)  |                    | 0.008***<br>(0.001)   |                       | 0.12***<br>(0.00)  |                    |
| <i>LogWords</i>                           | 0.10***<br>(0.01)  | -0.40***<br>(0.11) | 0.004***<br>(0.000)   | -0.039***<br>(0.008)  | 0.03***<br>(0.00)  | -0.28***<br>(0.03) |
| <i>LogFigures</i>                         | 0.35***<br>(0.01)  | 0.12*<br>(0.05)    | 0.014***<br>(0.000)   | 0.015***<br>(0.004)   | 0.15***<br>(0.00)  | 0.05***<br>(0.01)  |
| <i>LogAssignedClasses</i>                 | 0.39***<br>(0.01)  | 0.78***<br>(0.06)  | 0.016***<br>(0.001)   | 0.034***<br>(0.005)   | 0.15***<br>(0.00)  | 0.27***<br>(0.02)  |
| <i>LogCitedClasses</i>                    | 0.10***<br>(0.01)  | -0.52***<br>(0.05) | 0.001+<br>(0.001)     | -0.018***<br>(0.004)  | -0.06***<br>(0.00) | -0.14***<br>(0.01) |
| <i>LogPatentCites</i>                     | 0.15***<br>(0.01)  | 0.43***<br>(0.03)  | 0.001<br>(0.001)      | 0.015***<br>(0.003)   | 0.05***<br>(0.00)  | 0.11***<br>(0.01)  |
| <i>LogNonpatentCites</i>                  | 0.13***<br>(0.01)  | 0.17***<br>(0.03)  | 0.001***<br>(0.000)   | 0.005<br>(0.003)      | 0.07***<br>(0.00)  | 0.06***<br>(0.01)  |
| <i>Fees</i>                               | 0.46***<br>(0.02)  | 1.54***<br>(0.16)  | 0.022***<br>(0.001)   | 0.011<br>(0.017)      | 0.22***<br>(0.00)  | 0.33***<br>(0.03)  |
| <i>Sole</i><br>× <i>LogChunks(dm)</i>     | -0.10***<br>(0.02) |                    | -0.006***<br>(0.001)  |                       | -0.01*<br>(0.00)   |                    |
| <i>Sole</i><br>× <i>LogPastCollab(dm)</i> | 0.07***<br>(0.01)  | 0.19***<br>(0.05)  | 0.003***<br>(0.001)   | 0.010**<br>(0.004)    | 0.03***<br>(0.00)  | 0.02+<br>(0.01)    |
| Log $\sigma^2$                            | 0.93***<br>(0.01)  | 1.12***<br>(0.04)  |                       |                       |                    |                    |
| $\rho$                                    | 0.44***<br>(0.003) | 0.48***<br>(0.01)  |                       |                       |                    |                    |
| Filing-year FE                            | Yes                | Yes                | Yes                   | Yes                   | Yes                | Yes                |
| Lead-inventor effects                     | RE                 | RE                 | FE                    | FE                    | FE                 | FE                 |
| <i>N</i>                                  | 1,603,970          | 198,265            | 1,603,970             | 198,265               | 1,603,970          | 198,265            |
| Log-likelihood                            | -272,670           | -34,970            |                       |                       |                    |                    |
| $\chi^2$                                  | 26,023             | 1,495              |                       |                       |                    |                    |
| Within- $R^2$                             |                    |                    | 0.03                  | 0.01                  |                    |                    |
| <i>F</i>                                  |                    |                    | 246.60                | 9.72                  |                    |                    |
| Quantile objective                        |                    |                    |                       |                       | 0.08               | 0.06               |

Notes: Standard errors (in parentheses) are clustered by lead-inventor. (*dm*) = de-measured; FE = fixed effects; RE = random effects.

+  $p < 0.10$ , \* $p < 0.05$ , \*\* $p < 0.01$ , \*\*\* $p < 0.00$

**Table 8:** Effect of the lone inventor assessed at different quantiles of the log-citation distribution—utility patents

| Variable                               | Quantile: | Q = 0.05        | Q = 0.25        | Q = 0.5         | Q = 0.75        | Q = 0.95        |
|----------------------------------------|-----------|-----------------|-----------------|-----------------|-----------------|-----------------|
|                                        |           | Model 28        | Model 29        | Model 30        | Model 31        | Model 32        |
| <i>Sole</i>                            |           | -0.09*** (0.01) | -0.06*** (0.00) | -0.07*** (0.00) | -0.07*** (0.00) | -0.05*** (0.01) |
| <i>LogPastCollab(dm)</i>               |           | 0.03*** (0.00)  | 0.00 (0.00)     | -0.00*** (0.00) | -0.02*** (0.00) | -0.03*** (0.00) |
| <i>LogExp</i>                          |           | -0.38*** (0.01) | -0.31*** (0.00) | -0.24*** (0.00) | -0.15*** (0.00) | -0.10*** (0.01) |
| <i>LogExpDiversity</i>                 |           | -0.03*** (0.01) | -0.03*** (0.00) | 0.16*** (0.00)  | 0.33*** (0.00)  | 0.32*** (0.01)  |
| <i>Assigned</i>                        |           | -0.16*** (0.01) | -0.02*** (0.00) | 0.02*** (0.00)  | 0.09*** (0.00)  | 0.18*** (0.00)  |
| <i>LogChunks(dm)</i>                   |           | 0.12*** (0.01)  | 0.09*** (0.00)  | 0.09*** (0.00)  | 0.09*** (0.00)  | 0.05*** (0.00)  |
| <i>LogClaims</i>                       |           | 0.05*** (0.00)  | 0.09*** (0.00)  | 0.09*** (0.00)  | 0.09*** (0.00)  | 0.12*** (0.00)  |
| <i>LogWords</i>                        |           | 0.10*** (0.00)  | 0.06*** (0.00)  | 0.06*** (0.00)  | 0.06*** (0.00)  | 0.03*** (0.00)  |
| <i>LogFigures</i>                      |           | 0.16*** (0.00)  | 0.16*** (0.00)  | 0.16*** (0.00)  | 0.16*** (0.00)  | 0.15*** (0.00)  |
| <i>LogAssignedClasses</i>              |           | 0.14*** (0.00)  | 0.14*** (0.00)  | 0.14*** (0.00)  | 0.14*** (0.00)  | 0.15*** (0.00)  |
| <i>LogCitedClasses</i>                 |           | -0.10*** (0.00) | -0.09*** (0.00) | -0.09*** (0.00) | -0.09*** (0.00) | -0.06*** (0.00) |
| <i>LogPatentCites</i>                  |           | 0.18*** (0.00)  | 0.12*** (0.00)  | 0.12*** (0.00)  | 0.12*** (0.00)  | 0.05*** (0.00)  |
| <i>LogNonpatentCites</i>               |           | -0.01*** (0.00) | 0.01*** (0.00)  | 0.03*** (0.00)  | 0.04*** (0.00)  | 0.07*** (0.00)  |
| <i>Fees</i>                            |           | 0.08*** (0.00)  | 0.13*** (0.00)  | 0.14*** (0.00)  | 0.14*** (0.00)  | 0.22*** (0.00)  |
| <i>Sole</i> × <i>LogChunks(dm)</i>     |           | -0.05*** (0.01) | -0.02*** (0.00) | -0.02*** (0.00) | -0.02*** (0.00) | -0.01* (0.00)   |
| <i>Sole</i> × <i>LogPastCollab(dm)</i> |           | -0.00 (0.00)    | 0.02*** (0.00)  | 0.01*** (0.00)  | 0.01*** (0.00)  | 0.03*** (0.00)  |
| Filing-year FE                         |           | Yes             | Yes             | Yes             | Yes             | Yes             |
| Lead-inventor FE                       |           | Yes             | Yes             | Yes             | Yes             | Yes             |
| <i>N</i>                               |           | 1,603,970       | 1,603,970       | 1,603,970       | 1,603,970       | 1,603,970       |
| Quantile objective                     |           | 0.08            | 0.21            | 0.24            | 0.21            | 0.08            |

**Table 9:** Effect of the lone inventor assessed at different quantiles of the log-citation distribution—design patents

| Variable                               | Quantile: | Q = 0.05        | Q = 0.25        | Q = 0.5         | Q = 0.75        | Q = 0.95        |
|----------------------------------------|-----------|-----------------|-----------------|-----------------|-----------------|-----------------|
|                                        |           | Model 33        | Model 34        | Model 35        | Model 36        | Model 37        |
| <i>Sole</i>                            |           | 0.01 (0.02)     | 0.01 (0.01)     | 0.01*** (0.00)  | 0.01+ (0.01)    | 0.01 (0.01)     |
| <i>LogPastCollab(dm)</i>               |           | 0.09*** (0.01)  | 0.05*** (0.01)  | 0.01*** (0.00)  | -0.03*** (0.01) | -0.06*** (0.01) |
| <i>LogExp</i>                          |           | -0.24*** (0.01) | -0.19*** (0.01) | -0.08*** (0.00) | -0.00 (0.01)    | 0.02* (0.01)    |
| <i>LogExpDiversity</i>                 |           | -0.26*** (0.02) | -0.16*** (0.01) | 0.04*** (0.01)  | 0.26*** (0.01)  | 0.29*** (0.02)  |
| <i>Assigned</i>                        |           | -0.24*** (0.01) | -0.05*** (0.00) | 0.04*** (0.00)  | 0.16*** (0.00)  | 0.28*** (0.01)  |
| <i>LogWords</i>                        |           | -0.35*** (0.03) | -0.33*** (0.00) | -0.33*** (0.00) | -0.33*** (0.00) | -0.28*** (0.03) |
| <i>LogFigures</i>                      |           | 0.15*** (0.01)  | 0.09*** (0.00)  | 0.09*** (0.00)  | 0.09*** (0.00)  | 0.05*** (0.01)  |
| <i>LogAssignedClasses</i>              |           | 0.43*** (0.02)  | 0.35*** (0.00)  | 0.35*** (0.00)  | 0.35*** (0.00)  | 0.27*** (0.02)  |
| <i>LogCitedClasses</i>                 |           | -0.01 (0.01)    | -0.11*** (0.00) | -0.11*** (0.00) | -0.11*** (0.00) | -0.14*** (0.01) |
| <i>LogPatentCites</i>                  |           | 0.16*** (0.01)  | 0.15*** (0.00)  | 0.15*** (0.00)  | 0.15*** (0.00)  | 0.11*** (0.01)  |
| <i>LogNonpatentCites</i>               |           | 0.01+ (0.01)    | 0.03*** (0.00)  | 0.03*** (0.00)  | 0.03*** (0.00)  | 0.06*** (0.01)  |
| <i>Fees</i>                            |           | -0.04 (0.03)    | 0.17*** (0.00)  | 0.17*** (0.00)  | 0.17*** (0.00)  | 0.33*** (0.03)  |
| <i>Sole</i> × <i>LogPastCollab(dm)</i> |           | 0.01 (0.02)     | 0.02* (0.01)    | 0.02*** (0.00)  | 0.02** (0.01)   | 0.02+ (0.01)    |
| Filing-year FE                         |           | Yes             | Yes             | Yes             | Yes             | Yes             |
| Lead-inventor FE                       |           | Yes             | Yes             | Yes             | Yes             | Yes             |
| <i>N</i>                               |           | 198,265         | 198,265         | 198,265         | 198,265         | 198,265         |
| Quantile objective                     |           | 0.07            | 0.17            | 0.20            | 0.17            | 0.06            |

Notes (Tables 8 and 9): Standard errors (in parentheses) are clustered by lead inventor; (*dm*) = de-meaned. Fixed effects (FE) are assumed to have a common mean effect on log-citations (cf. Canay 2011).

+  $p < 0.10$ , \*  $p < 0.05$ , \*\*  $p < 0.01$ , \*\*\*  $p < 0.001$

**Table 10:** Effect of sole inventor at the top 1<sup>st</sup> percentile (*Top1*) and the bottom 5<sup>th</sup> percentile (*Bottom5*) of citations

| <b>Data set</b>                 | <i>Utility</i>            | <i>Design</i>   | <i>Utility</i>       | <i>Design</i>   |
|---------------------------------|---------------------------|-----------------|----------------------|-----------------|
| <b>Dependent variable</b>       | <i>Top1</i>               | <i>Top1</i>     | <i>Bottom5</i>       | <i>Bottom5</i>  |
| <b>Variable</b>                 | <b>Model 38</b>           | <b>Model 39</b> | <b>Model 40</b>      | <b>Model 41</b> |
| <i>Sole</i>                     | -0.16*** (0.03)           | 0.12 (0.12)     | 0.14*** (0.01)       | 0.01 (0.06)     |
| <i>LogPastCollab(dm)</i>        | -0.01 (0.04)              | -0.04 (0.15)    | -0.03 (0.02)         | 0.02 (0.05)     |
| <i>LogExp</i>                   | -0.58*** (0.05)           | -0.39*** (0.12) | 0.48*** (0.03)       | 0.21*** (0.05)  |
| <i>LogExpDiversity</i>          | 0.37*** (0.06)            | 0.30 (0.23)     | -0.30*** (0.03)      | -0.01 (0.08)    |
| <i>Assigned</i>                 | 0.01 (0.06)               | 0.26 (0.17)     | -0.03 (0.03)         | 0.10 (0.08)     |
| <i>LogChunks(dm)</i>            | 0.18*** (0.04)            |                 | -0.16*** (0.02)      |                 |
| <i>LogClaims</i>                | 0.19*** (0.03)            |                 | -0.14*** (0.01)      |                 |
| <i>LogWords</i>                 | 0.08** (0.03)             | -1.09*** (0.33) | -0.13*** (0.01)      | 0.66*** (0.15)  |
| <i>LogFigures</i>               | 0.31*** (0.02)            | 0.19 (0.12)     | -0.28*** (0.01)      | -0.26*** (0.06) |
| <i>LogAssignedClasses</i>       | 0.42*** (0.02)            | 0.95*** (0.19)  | -0.26*** (0.01)      | -0.98*** (0.10) |
| <i>LogCitedClasses</i>          | 0.13** (0.04)             | -0.33** (0.12)  | 0.28*** (0.02)       | 0.24*** (0.06)  |
| <i>LogPatentCites</i>           | -0.03 (0.03)              | 0.13 (0.08)     | -0.33*** (0.01)      | -0.37*** (0.04) |
| <i>LogNonpatentCites</i>        | 0.05** (0.02)             | 0.20** (0.08)   | -0.06*** (0.01)      | -0.12** (0.04)  |
| <i>Fees</i>                     | 0.46*** (0.05)            | 0.33 (0.61)     | -0.19*** (0.03)      | -0.47 (0.27)    |
| <i>Sole × LogChunks(dm)</i>     | -0.07 <sup>+</sup> (0.04) |                 | 0.03* (0.02)         |                 |
| <i>Sole × LogPastCollab(dm)</i> | 0.08** (0.03)             | 0.30** (0.12)   | -0.02 (0.01)         | -0.06 (0.06)    |
| Filing-year FE                  | Yes                       | Yes             | Yes                  | Yes             |
| Lead-inventor FE                | Yes                       | Yes             | Yes                  | Yes             |
| <i>N</i>                        | 136,056                   | 18,711          | 470,958 <sup>a</sup> | 53,365          |
| Log-likelihood                  | -25,558                   | -3,570          | -117,770             | -14,634         |
| $\chi^2$                        | 3,977                     | 228             | 26,743               | 628             |

*Notes:* Because *Bottom5* models predict failure, we expect their signs to be reversed. Standard errors (in parentheses) are clustered by lead inventor. (*dm*) = de-meaned; FE = fixed effects.

<sup>a</sup> In Model 40, identification requires that we observe the bottom tail of technology classes; hence classes with thick bottom tails (i.e., >20% of patents with no citations) are excluded.

<sup>+</sup>  $p < 0.10$ , \* $p < 0.05$ , \*\* $p < 0.01$ , \*\*\* $p < 0.001$

**Table 11:** Additional robustness models

| <b>Data set</b>                        | <i>Utility &amp; Design</i>   |                    | <i>Utility</i>                       | <i>Design</i>      | <i>Utility</i>                   | <i>Design</i>      | <i>Utility</i>                              | <i>Design</i>      |
|----------------------------------------|-------------------------------|--------------------|--------------------------------------|--------------------|----------------------------------|--------------------|---------------------------------------------|--------------------|
| <b>Specification</b>                   | Pooling design & utility data |                    | Controlling for team characteristics |                    | Omitting all collinear variables |                    | Interaction of <i>Sole</i> with <i>Fees</i> |                    |
| <b>Variable</b>                        | <b>M.42</b>                   | <b>M.43</b>        | <b>M.44</b>                          | <b>M.45</b>        | <b>M.46</b>                      | <b>M.47</b>        | <b>M.48</b>                                 | <b>M.49</b>        |
| <i>Sole</i>                            | -0.17***<br>(0.01)            | -0.14***<br>(0.01) | -0.10***<br>(0.02)                   | 0.10<br>(0.06)     | -0.15***<br>(0.02)               | 0.05<br>(0.06)     | -0.15***<br>(0.02)                          | 0.04<br>(0.06)     |
| <i>Design</i>                          | Absorbed in FE                |                    |                                      |                    |                                  |                    |                                             |                    |
| <i>Sole</i> × <i>Design</i>            | 0.24***<br>(0.05)             | 0.20***<br>(0.06)  |                                      |                    |                                  |                    |                                             |                    |
| <i>LogPastCollab(dm)</i>               | 0.02<br>(0.01)                | 0.01<br>(0.01)     | -0.02<br>(0.03)                      | -0.16<br>(0.12)    | -0.21***<br>(0.01)               | -0.11<br>(0.07)    | 0.02<br>(0.02)                              | 0.04<br>(0.07)     |
| <i>LogExp</i>                          | -0.44***<br>(0.02)            | -0.45***<br>(0.02) | -0.50***<br>(0.04)                   | -0.13<br>(0.10)    |                                  |                    | -0.52***<br>(0.03)                          | -0.30***<br>(0.07) |
| <i>LogExpDiversity</i>                 | 0.22***<br>(0.02)             | 0.22***<br>(0.02)  | 0.20***<br>(0.04)                    | 0.01<br>(0.17)     |                                  |                    | 0.27***<br>(0.03)                           | 0.21<br>(0.12)     |
| <i>Assigned</i>                        | 0.04<br>(0.03)                | 0.03<br>(0.02)     | 0.03<br>(0.03)                       | 0.13<br>(0.11)     | 0.06*<br>(0.03)                  | 0.14<br>(0.12)     | 0.03<br>(0.03)                              | 0.13<br>(0.11)     |
| <i>LogChunks(dm)</i>                   | 0.17***<br>(0.02)             | 0.19***<br>(0.02)  | 0.19***<br>(0.02)                    |                    | 0.38***<br>(0.01)                |                    | 0.19***<br>(0.02)                           |                    |
| <i>LogClaims</i>                       | 0.17***<br>(0.01)             | 0.17***<br>(0.01)  | 0.17***<br>(0.01)                    |                    |                                  |                    | 0.17***<br>(0.01)                           |                    |
| <i>LogWords</i>                        | 0.08***<br>(0.01)             | 0.08***<br>(0.01)  | 0.09***<br>(0.01)                    | -0.86***<br>(0.17) | 0.07***<br>(0.01)                | -0.91***<br>(0.17) | 0.09***<br>(0.01)                           | -0.86***<br>(0.17) |
| <i>LogFigures</i>                      | 0.30***<br>(0.01)             | 0.30***<br>(0.01)  | 0.30***<br>(0.01)                    | 0.27***<br>(0.07)  | 0.31***<br>(0.01)                | 0.27***<br>(0.07)  | 0.30***<br>(0.01)                           | 0.27***<br>(0.07)  |
| <i>LogAssignedClasses</i>              | 0.34***<br>(0.01)             | 0.34***<br>(0.01)  | 0.33***<br>(0.01)                    | 0.70***<br>(0.09)  | 0.34***<br>(0.01)                | 0.60***<br>(0.09)  | 0.33***<br>(0.01)                           | 0.69***<br>(0.09)  |
| <i>LogCitedClasses</i>                 | -0.04*<br>(0.02)              | -0.04*<br>(0.02)   | 0.01<br>(0.02)                       | -0.38***<br>(0.07) |                                  |                    | 0.02<br>(0.02)                              | -0.37***<br>(0.07) |
| <i>LogPatentCites</i>                  | 0.12***<br>(0.01)             | 0.12***<br>(0.01)  | 0.09***<br>(0.01)                    | 0.29***<br>(0.04)  | 0.10***<br>(0.01)                | 0.14***<br>(0.04)  | 0.09***<br>(0.01)                           | 0.29***<br>(0.04)  |
| <i>LogNonpatentCites</i>               | 0.05***<br>(0.01)             | 0.05***<br>(0.01)  | 0.05***<br>(0.01)                    | 0.07*<br>(0.04)    | 0.05***<br>(0.01)                | 0.07<br>(0.04)     | 0.05***<br>(0.01)                           | 0.07<br>(0.04)     |
| <i>Fees(dm)</i>                        | 0.38***<br>(0.02)             | 0.38***<br>(0.02)  | 0.38***<br>(0.03)                    | 0.41<br>(0.33)     |                                  |                    | 0.43***<br>(0.03)                           | 0.43<br>(0.36)     |
| <i>LogTeamExp</i>                      |                               |                    | -0.03<br>(0.03)                      | -0.19*<br>(0.10)   |                                  |                    |                                             |                    |
| <i>LogTeamExpDiversity</i>             |                               |                    | 0.09*<br>(0.04)                      | 0.21<br>(0.14)     |                                  |                    |                                             |                    |
| <i>LogTeamPastCollab</i>               |                               |                    | 0.07**<br>(0.03)                     | 0.24*<br>(0.10)    |                                  |                    |                                             |                    |
| <i>Sole</i> × <i>Fees(dm)</i>          |                               |                    |                                      |                    |                                  |                    | -0.13***<br>(0.03)                          | -0.01<br>(0.31)    |
| <i>Sole</i> × <i>LogChunks(dm)</i>     |                               | -0.07***<br>(0.02) | -0.07***<br>(0.02)                   |                    | -0.07***<br>(0.02)               |                    | -0.06**<br>(0.02)                           |                    |
| <i>Sole</i> × <i>LogPastCollab(dm)</i> |                               | 0.07***<br>(0.01)  | 0.04**<br>(0.01)                     | 0.16*<br>(0.06)    | 0.03*<br>(0.01)                  | 0.17**<br>(0.06)   | 0.07***<br>(0.01)                           | 0.18**<br>(0.06)   |
| Filing-year FE                         | Yes                           | Yes                | Yes                                  | Yes                | Yes                              | Yes                | Yes                                         | Yes                |
| Lead-inventor FE                       | Yes                           | Yes                | Yes                                  | Yes                | Yes                              | Yes                | Yes                                         | Yes                |
| <i>N</i>                               | 415,249                       | 415,249            | 368,899                              | 46,350             | 368,899                          | 46,350             | 368,899                                     | 46,350             |
| Log-likelihood                         | -107,165                      | -107,141           | -93,866                              | -13,126            | -94,506                          | -13,208            | -93,890                                     | -13,136            |
| $\chi^2$                               | 30,007                        | 30,055             | 12,260                               | 455                | 10,818                           | 341                | 12,273                                      | 446                |

Notes: Standard errors (in parentheses) are clustered by lead inventor. (*dm*) = de-meanded; FE = fixed effects; **M.** = Model.

\* $p < 0.05$ , \*\* $p < 0.01$ , \*\*\* $p < 0.001$

**Table 12:** Modeling technology/firm heterogeneity; testing for alternative ways to identify inventors

| <b>Data set</b>                           | <i>Utility</i>                       | <i>Design</i>      | <i>Utility</i>              | <i>Design</i>      | <i>Utility</i>         | <i>Utility</i>            | <i>Design</i>      |
|-------------------------------------------|--------------------------------------|--------------------|-----------------------------|--------------------|------------------------|---------------------------|--------------------|
| <b>Specification</b>                      | Modeling product-class heterogeneity |                    | Modeling firm heterogeneity |                    | Alternative inventorID | Random-inventor benchmark |                    |
| <b>Variable</b>                           | <b>M.50</b>                          | <b>M.51</b>        | <b>M.52</b>                 | <b>M.53</b>        | <b>M.54</b>            | <b>M.55</b>               | <b>M.56</b>        |
| <i>Sole</i>                               | -0.17***<br>(0.02)                   | 0.00<br>(0.07)     | -0.15***<br>(0.02)          | 0.05<br>(0.07)     | 0.39*<br>(0.16)        | -0.16***<br>(0.02)        | 0.03<br>(0.06)     |
| <i>LogPastCollab(dm)</i>                  | 0.02<br>(0.02)                       | 0.08<br>(0.08)     | -0.02<br>(0.02)             | 0.06<br>(0.08)     | 0.02<br>(0.02)         | 0.09***<br>(0.02)         | 0.11+<br>(0.06)    |
| <i>LogExp</i>                             | -0.44***<br>(0.04)                   | -0.26***<br>(0.08) | -0.44***<br>(0.03)          | -0.28***<br>(0.08) | -0.53***<br>(0.03)     | -0.56***<br>(0.03)        | -0.28***<br>(0.06) |
| <i>LogExpDiversity</i>                    | -0.01<br>(0.05)                      | 0.07<br>(0.13)     | 0.24***<br>(0.04)           | 0.14<br>(0.13)     | 0.30***<br>(0.03)      | 0.26***<br>(0.03)         | 0.19+<br>(0.10)    |
| <i>Assigned</i>                           | 0.10*<br>(0.04)                      | 0.11<br>(0.13)     |                             |                    | 0.03<br>(0.03)         | 0.02<br>(0.03)            | 0.12<br>(0.11)     |
| <i>LogChunks(dm)</i>                      | 0.23***<br>(0.02)                    |                    | 0.19***<br>(0.02)           |                    | 0.18***<br>(0.02)      | 0.20***<br>(0.02)         |                    |
| <i>LogClaims</i>                          | 0.17***<br>(0.02)                    |                    | 0.17***<br>(0.02)           |                    | 0.18***<br>(0.01)      | 0.17***<br>(0.01)         |                    |
| <i>LogWords</i>                           | 0.10***<br>(0.02)                    | -0.88***<br>(0.21) | 0.10***<br>(0.01)           | -0.84***<br>(0.19) | 0.09***<br>(0.01)      | 0.08***<br>(0.01)         | -0.82***<br>(0.16) |
| <i>LogFigures</i>                         | 0.34***<br>(0.01)                    | 0.32***<br>(0.08)  | 0.32***<br>(0.01)           | 0.34***<br>(0.07)  | 0.30***<br>(0.01)      | 0.31***<br>(0.01)         | 0.28***<br>(0.06)  |
| <i>LogAssignedClasses</i>                 | 0.35***<br>(0.02)                    | 0.75***<br>(0.11)  | 0.33***<br>(0.01)           | 0.71***<br>(0.09)  | 0.34***<br>(0.01)      | 0.33***<br>(0.01)         | 0.67***<br>(0.08)  |
| <i>LogCitedClasses</i>                    | -0.03<br>(0.03)                      | -0.35***<br>(0.08) | -0.01<br>(0.02)             | -0.38***<br>(0.07) | 0.02<br>(0.02)         | 0.03<br>(0.02)            | -0.32***<br>(0.06) |
| <i>LogPatentCites</i>                     | 0.08***<br>(0.02)                    | 0.24***<br>(0.05)  | 0.09***<br>(0.01)           | 0.29***<br>(0.05)  | 0.09***<br>(0.01)      | 0.09***<br>(0.01)         | 0.30***<br>(0.04)  |
| <i>LogNonpatentCites</i>                  | 0.03**<br>(0.01)                     | 0.06<br>(0.05)     | 0.05***<br>(0.01)           | 0.04<br>(0.04)     | 0.05***<br>(0.01)      | 0.05***<br>(0.01)         | 0.08*<br>(0.03)    |
| <i>Fees</i>                               | 0.33***<br>(0.04)                    | 0.56<br>(0.38)     | 0.36***<br>(0.03)           | 0.19<br>(0.41)     | 0.38***<br>(0.03)      | 0.36***<br>(0.03)         | 0.23<br>(0.32)     |
| <i>Sole</i> ×<br><i>LogChunks(dm)</i>     | -0.09***<br>(0.03)                   |                    | -0.08***<br>(0.02)          |                    | -0.06**<br>(0.02)      | -0.08***<br>(0.02)        |                    |
| <i>Sole</i> ×<br><i>LogPastCollab(dm)</i> | 0.05**<br>(0.02)                     | 0.18**<br>(0.07)   | 0.04*<br>(0.02)             | 0.15*<br>(0.06)    | 0.05***<br>(0.01)      | 0.04**<br>(0.01)          | 0.11+<br>(0.06)    |
| Filing-year FE                            | Yes                                  | Yes                | Yes                         | Yes                | Yes                    | Yes                       | Yes                |
| Lead-inventor FE                          | Lead inventor × Product class        |                    | Lead inventor × Firm        |                    | Yes                    | Yes                       | Yes                |
| <i>N</i>                                  | 192,311                              | 36,588             | 277,063                     | 38,197             | 378,195                | 320,276                   | 43,111             |
| Log-likelihood                            | -50,122                              | -11,003            | -73,421                     | -11,295            | -96,187                | -82,323                   | -12,229            |
| $\chi^2$                                  | 8,803                                | 382                | 9,870                       | 421                | 12,465                 | 13,169                    | 485                |

Notes: Standard errors (in parentheses) are clustered by lead inventor. (dm) = de-meanded; FE = fixed effects; M. = Model.

+  $p < 0.10$ , \*  $p < 0.05$ , \*\*  $p < 0.01$ , \*\*\*  $p < 0.001$

**Table 13:** First-stage regressions predicting *Sole*

| <b>Dataset</b>              | <b>Utility</b>  | <b>Design</b>   |
|-----------------------------|-----------------|-----------------|
| <b>Specification</b>        | First-stage     | First-stage     |
| <b>Variable</b>             | <b>Model 57</b> | <b>Model 58</b> |
| <i>LogLawyers</i>           | -0.08***(0.02)  | -0.13* (0.05)   |
| <i>LogPastCollab(dm)</i>    | 0.07***(0.02)   | 0.23***(0.05)   |
| <i>LogExp</i>               | -0.06** (0.02)  | -0.15***(0.04)  |
| <i>LogExpDiversity</i>      | -0.05 (0.02)    | -0.23** (0.08)  |
| <i>Assigned</i>             | -0.88***(0.02)  | -0.66***(0.09)  |
| <i>LogChunks(dm)</i>        | -0.05** (0.01)  |                 |
| <i>LogClaims</i>            | -0.04***(0.01)  |                 |
| <i>LogWords</i>             | -0.04***(0.01)  | -0.30* (0.14)   |
| <i>LogFigures</i>           | -0.32***(0.01)  | -0.32***(0.05)  |
| <i>LogAssignedClasses</i>   | -0.01 (0.01)    | 0.03 (0.09)     |
| <i>LogCitedClasses</i>      | -0.05** (0.02)  | -0.21***(0.05)  |
| <i>LogPatentCites</i>       | -0.05***(0.01)  | -0.02 (0.03)    |
| <i>LogNonpatentCites</i>    | -0.04***(0.01)  | -0.01 (0.03)    |
| <i>Fees</i>                 | -0.39***(0.02)  | -1.78***(0.23)  |
| Filing Year Fixed Effects   | Yes             | Yes             |
| Lead Inventor Fixed Effects | Yes             | Yes             |
| <i>N</i>                    | 368,899         | 46,350          |
| Log-likelihood              | -115,894        | -10,719         |
| $\chi^2$                    | 6,579           | 770             |

Notes: Standard errors (in parentheses) are clustered by lead inventor; (dm) = demeaned

\*  $p < 0.05$ , \*\*  $p < 0.01$ , \*\*\*  $p < 0.001$
